# Supplementary material for: A Chinese version of the Language Screening Test (CLAST) for early-stage stroke patients
Source: PubMed Central journal article supplement (PMC5935384; doi:10.1371/journal.pone.0196646), 2018-05-04
Supplement: pone.0196646.s002.pdf [file pone.0196646.s002.pdf]

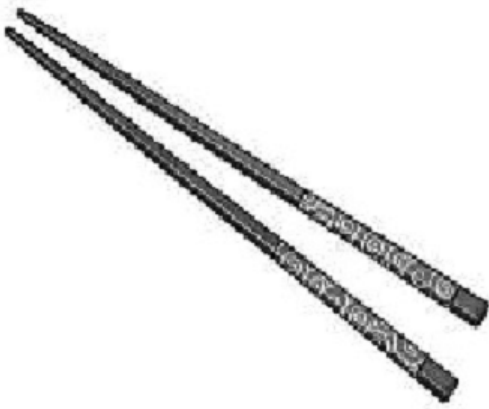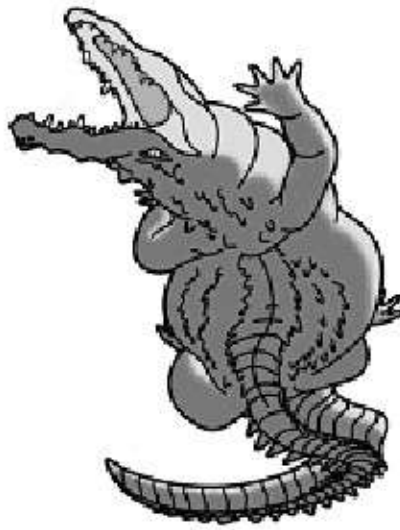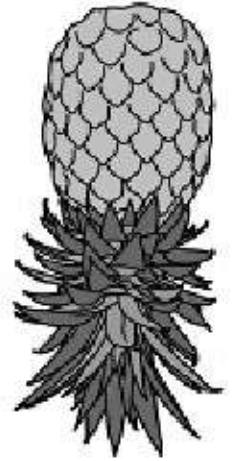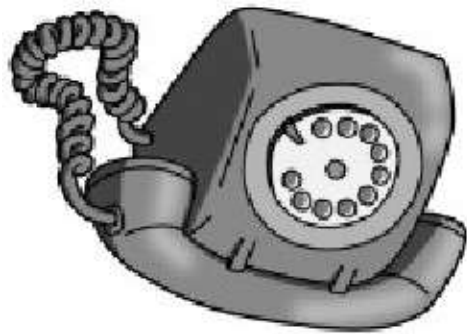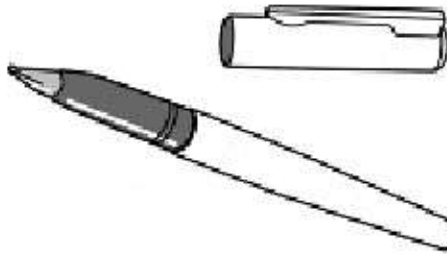

Chinese Version of Language Screening Test  
CLAST-a

Name: \_\_\_\_\_  
Age: \_\_\_\_\_  
Gender: \_\_\_\_\_

Education: \_\_\_\_\_ Admission number: \_\_\_\_\_  
Diagnosis: \_\_\_\_\_  
CT or MRI: \_\_\_\_\_

Date: \_\_\_/\_\_\_/\_\_\_ Rater: \_\_\_

| Expression index              |                                            | SCORE |           |
|-------------------------------|--------------------------------------------|-------|-----------|
| Naming                        | Phone                                      | /1    |           |
|                               | Pineapple                                  | /1    |           |
|                               | Pen                                        | /1    |           |
|                               | Crocodile                                  | /1    |           |
|                               | Chopsticks                                 | /1    |           |
|                               | <b>Naming Score</b>                        |       |           |
| Repetition                    | Mathematics                                | /1    |           |
|                               | The postman brings a letter to my neighbor | /1    |           |
|                               | <b>Repetition Score</b>                    |       |           |
| Automatic Speech              | Count from 1 to 10                         | /1    |           |
|                               | <b>Automatic speech Score</b>              |       |           |
| <b>Expression index Score</b> |                                            |       | <b>/8</b> |

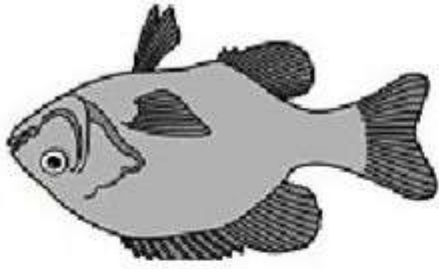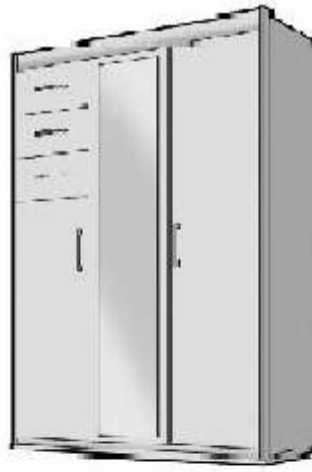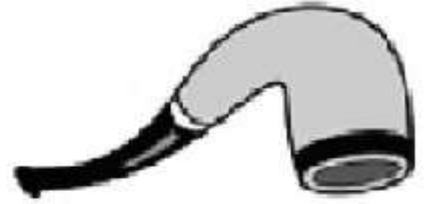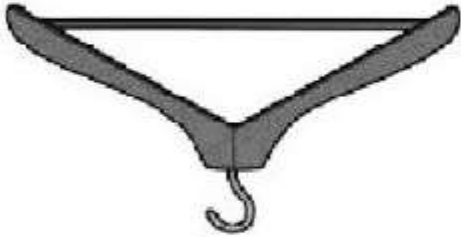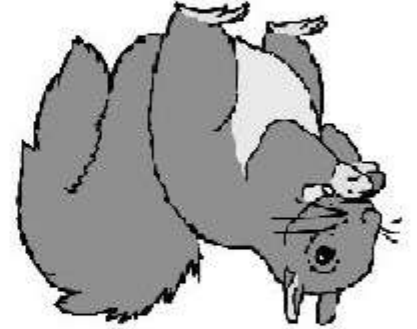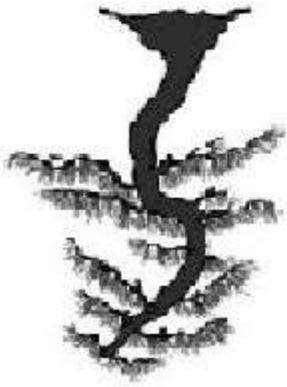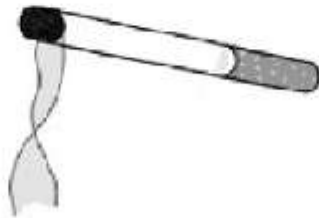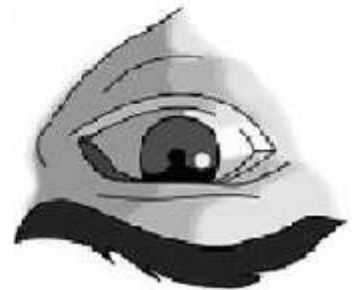

| Receptive index              |                                                     | SCORE |     |
|------------------------------|-----------------------------------------------------|-------|-----|
| Picture recognition          | Squirrel                                            | /1    |     |
|                              | Wardrobe                                            | /1    |     |
|                              | Cigarette                                           | /1    |     |
|                              | Eye                                                 | /1    |     |
|                              | <b>Picture recognition Score</b>                    |       |     |
| Verbal instructions          | Don't take the drink-glass but the pen              | /1    |     |
|                              | Put a hand on your head, then a finger on your nose | /1    |     |
|                              | <b>Verbal instruction Score</b>                     |       |     |
| <b>Receptive index Score</b> |                                                     |       | /6  |
| <b>CLAST TOTAL SCORE</b>     |                                                     |       | /14 |
