# Supplementary material for: A Chinese version of the Language Screening Test (CLAST) for early-stage stroke patients
Source: PubMed Central journal article supplement (PMC5935384; doi:10.1371/journal.pone.0196646), 2018-05-04
Supplement: pone.0196646.s003.pdf [file pone.0196646.s003.pdf]

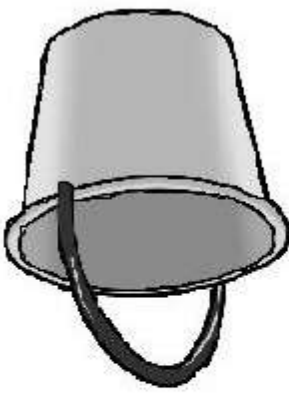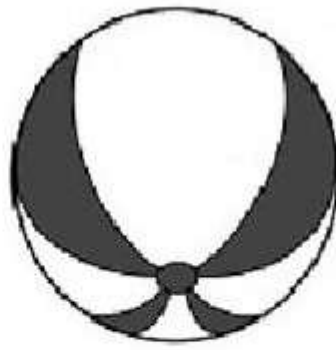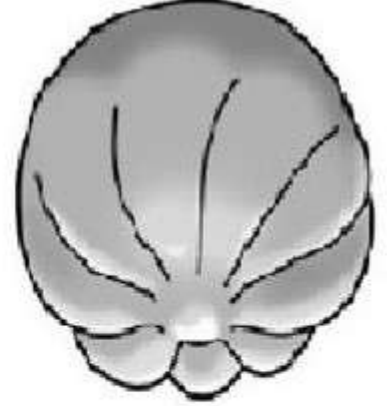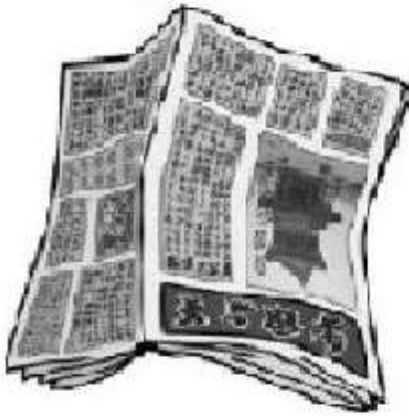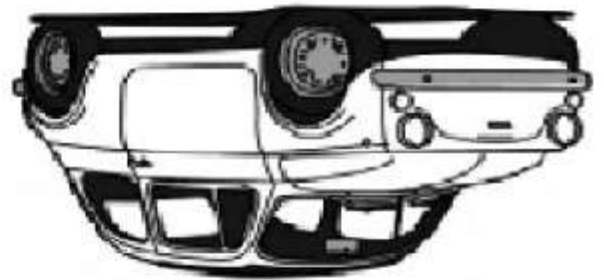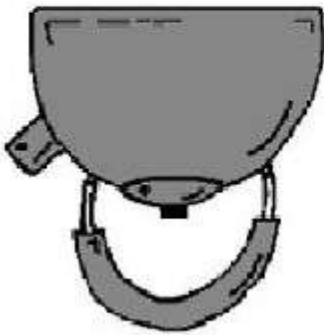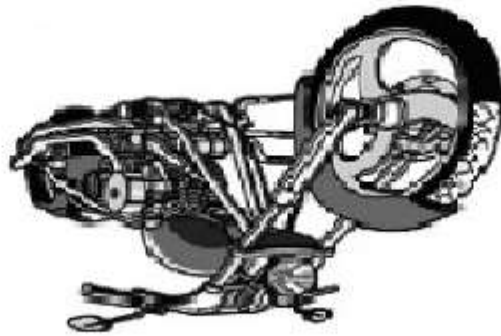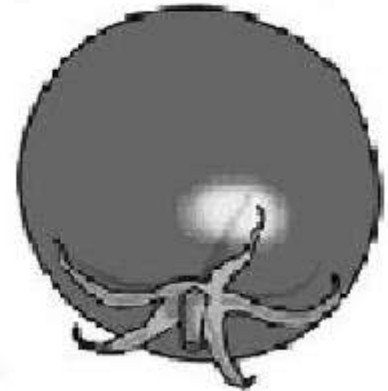

| Receptive index              |                                                                             | SCORE |     |
|------------------------------|-----------------------------------------------------------------------------|-------|-----|
| <b>Picture recognition</b>   | Newspapers                                                                  | /1    |     |
|                              | Bucket                                                                      | /1    |     |
|                              | Car                                                                         | /1    |     |
|                              | Tomato                                                                      | /1    |     |
|                              | <b>Picture recognition Score</b>                                            |       |     |
| <b>Verbal instructions</b>   | Don't take the leaf but the key                                             | /1    |     |
|                              | Touch one of your ears with one finger, then your forehead with two fingers | /1    |     |
|                              | <b>Verbal instruction Score</b>                                             |       |     |
| <b>Receptive index Score</b> |                                                                             |       | /6  |
| <b>CLAST TOTAL SCORE</b>     |                                                                             |       | /14 |
